# Supplementary material
Source: PubMed Central journal article supplement (PMC5040492)
Supplement: NIHMS69920-supplement-Supplement.pdf [file NIHMS69920-supplement-Supplement.pdf]

**a**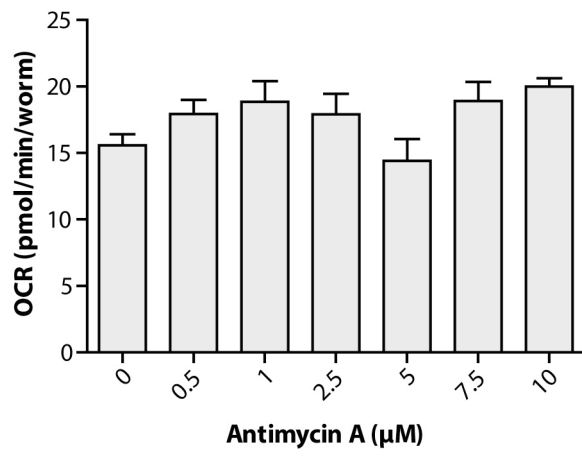**b**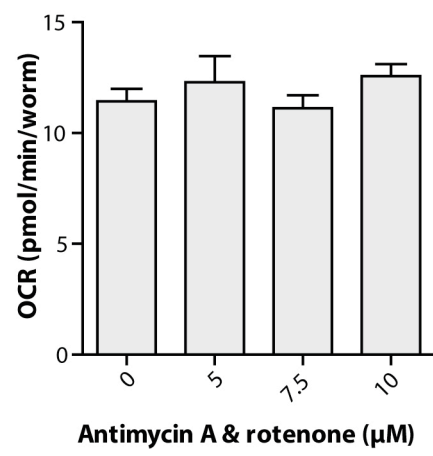**Supplementary Figure 1**

Titration of antimycin A and rotenone

(a) Titration of Antimycin A, n = 8-12 wells, and (b) Antimycin A & Rotenone, 8-16 wells, does not decrease the OCR. One-way ANOVA (ns). Bars are mean  $\pm$  SEM.

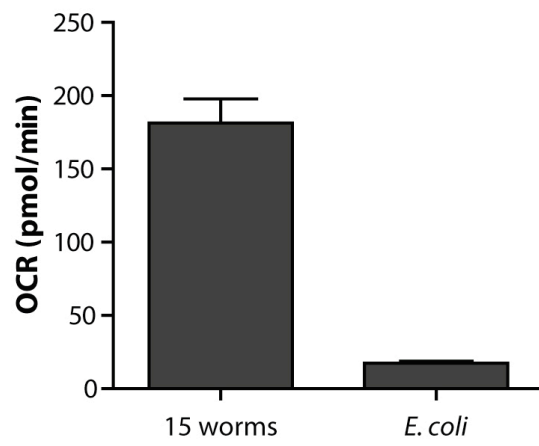

**Supplementary Figure 2**

Respiration rate of *E. coli*

Respiration rates of 15 worms compared to *E. coli* measured with a XFp respirometer. The respiration of *E. coli* is clearly lower than the respiration of worms. Bars are mean  $\pm$  SEM.

### Pre-experimental: Plate lay-out

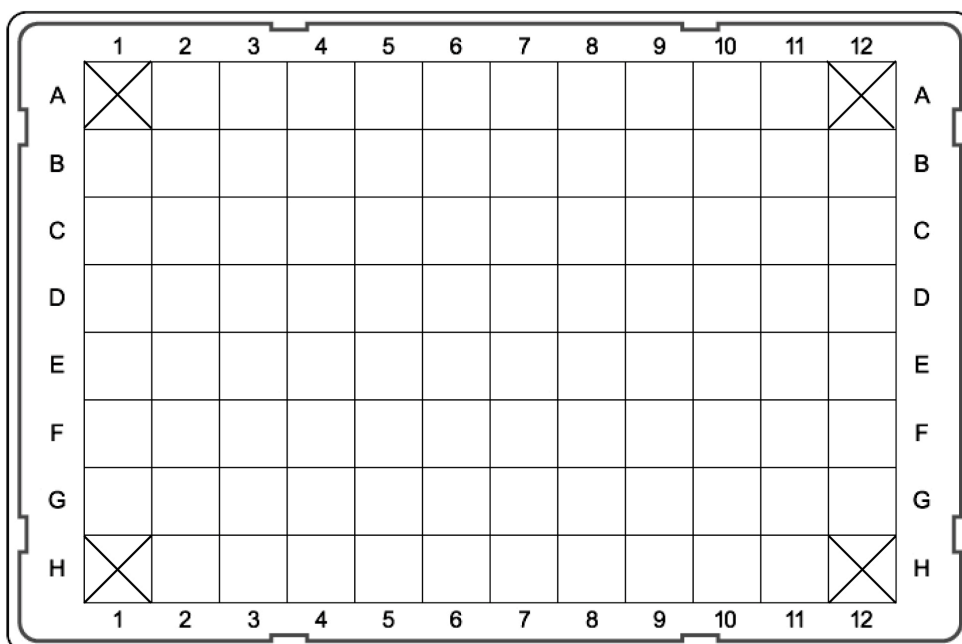

### Post-experimental: # of worms per well

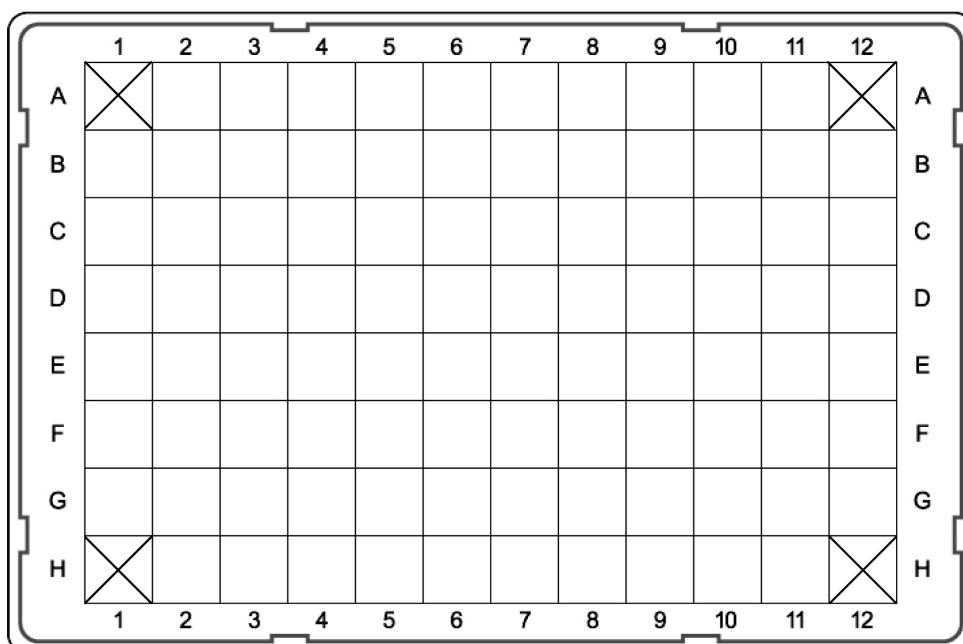

#### Supplementary Figure 3

XF96 plate layout

This figure shows a representative plate layout that can be filled in for pre- and post-experimental preparation and analysis.

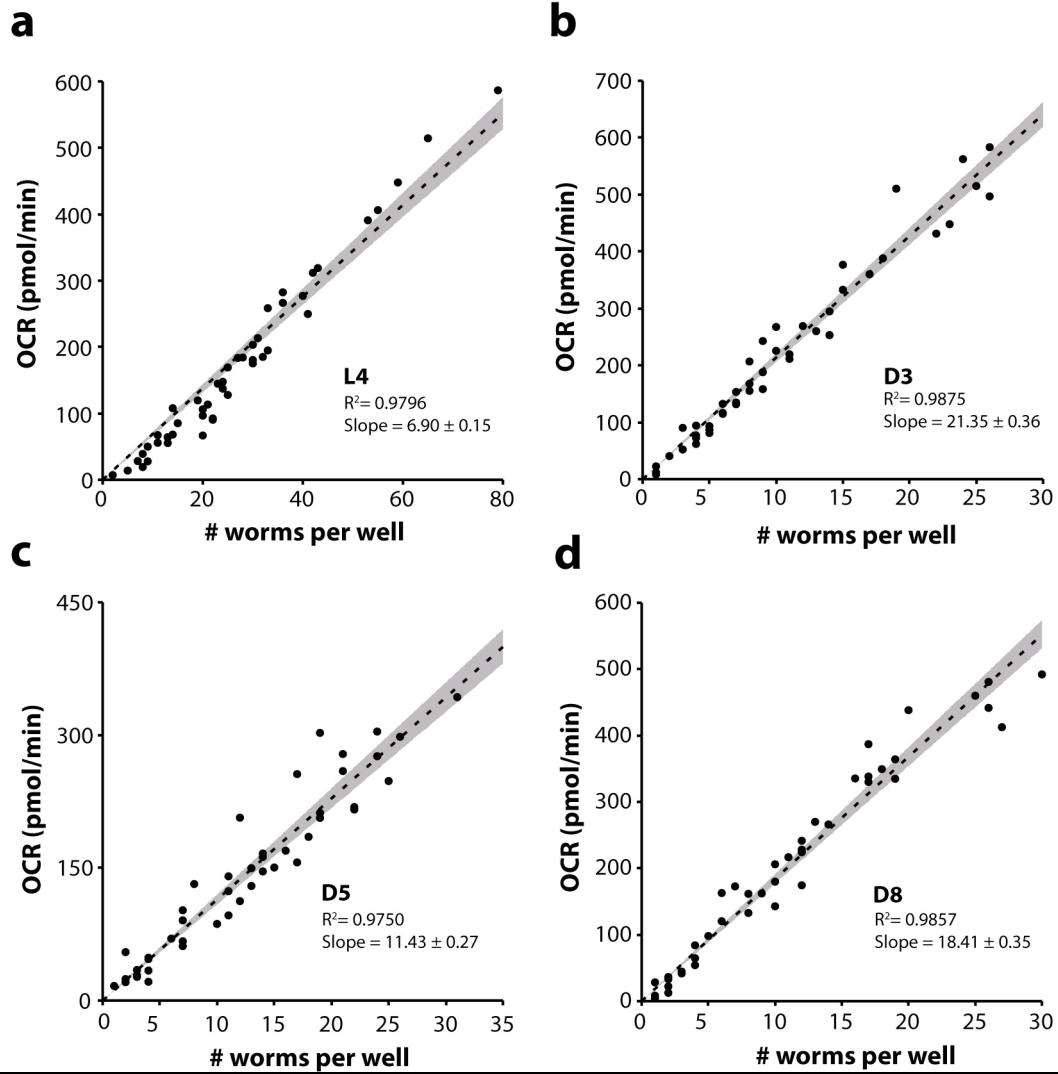

**Supplementary Figure 4**

Respiration correlates with the number of worms

Linear regression of the OCR as dependent variable of the number of worms in (a) L4s, (b) Adult day 3, (c) Adult day 5 and (d) Adult day 8. Grey area shows the confidence interval (95%). The dotted line in a-d shows the linear regression, n = 44-48 in a-d.
